# Supplementary material for: The Measurement of Food Insecurity in High-Income Countries: A Scoping Review
Source: MDPI journal article supplement (doi:10.3390/ijerph18189829), 2021-09-17
Supplement: s1 [file s1]

|                                                                                                                                                                                                                                                                                                                                                                                                                                                                                   |
|-----------------------------------------------------------------------------------------------------------------------------------------------------------------------------------------------------------------------------------------------------------------------------------------------------------------------------------------------------------------------------------------------------------------------------------------------------------------------------------|
| <p><b>CINAHL. (10 results)</b><br/>( "food insecurity" OR "food security" OR "dietary diversity" ) AND ( "measure*" OR "scale" OR "questionnaire" OR "assessment" ) AND ( "high income countr*" OR "developed countr*" ) AND ( "individual*" OR "household*" )<br/>From 2000/1/1 to 2020/12/31<br/>Age groups: <i>adolescent: 13-18 years + all adult + adult: 19-44 years + middle aged: 45-64 years + aged: 65+ years</i><br/>Apply related words + apply equivalent topics</p> |
| <p><b>COCHRANE TRIALS. (7 results)</b><br/>( "food insecurity" OR "food security" OR "dietary diversity" ) AND ( measure* OR scale OR questionnaire OR assessment ) AND ( "high income countr*" OR "developed countr*" ) AND ( individual OR household* )<br/>Publication Year from 2000 to 2020, in Trials<br/>(Word variations have been searched)</p>                                                                                                                          |
| <p><b>FSTA (Food Science ). (34 results)</b><br/>(food insecurity.mp. OR food security.mp. OR dietary diversity.mp.) AND (measure*.mp. OR scale\$.mp. OR questionnaire\$.mp. OR assessment\$.mp.) AND (developed countr*.mp. OR high income country.mp. OR high income countries.mp.) AND (individual\$.mp. OR household\$.mp.)<br/>Publication date: 2000-2020.</p>                                                                                                              |
| <p><b>MEDLINE (PubMed). (17 results)</b><br/>(((("food insecurity" OR "food security" OR "dietary diversity") AND ("measure*" OR "scale*" OR "questionnaire*" OR "assessment*")) AND ("high income countr*" OR "developed countr*")) AND ("individual*" OR "household*"))<br/>From 2000/1/1 to 2020/12/31<br/>Age: From <i>Adolescent to 80 and over</i></p>                                                                                                                      |
| <p><b>PSYCINFO. (6 results)</b><br/>("food insecurity" OR "food security" OR "dietary diversity" ) AND ("measure*" OR "scale" OR "questionnaire" OR "assessment" ) AND ("high income countr*" OR "developed countr*" ) AND ("individual*" OR "household*" )<br/>Publication date: 20000101-20201231<br/>Age: From Adolescents to Very Old<br/>Apply related words + apply equivalent topics</p>                                                                                   |
| <p><b>SCOPUS. (66 results)</b><br/>(TITLE-ABS-KEY ( ( "food insecurity" OR "food security" OR "dietary diversity" ) ) AND TITLE-ABS-KEY ( "measure" OR "measurement" OR "scale" OR "questionnaire" OR "assessment" ) AND TITLE-ABS-KEY ( "high income country" OR "developed country" ) AND TITLE-ABS-KEY ( "individual" OR "household" ) )<br/>From 2000/1/1 to 2020/12/31</p>                                                                                                   |
| <p><b>SOCIOLOGICAL ABSTRACTS. (3 results)</b><br/>noft("food insecurity" OR "food security" OR "dietary diversity") AND noft(measure OR scale OR questionnaire OR assessment) AND noft("high income country" OR "developed country") AND noft(individual OR household)<br/>Include: Spelling variants of search terms + Form variants of your search terms<br/>noft=<i>anywhere except full text</i><br/>Date: From 01 January 2000 to 31 December 2020</p>                       |
| <p><b>WOS (Web Of Science Core Collection). (Results: 59)</b><br/>TOPIC: ("food insecurity" OR "food security" OR "dietary diversity") AND TOPIC: (measure* OR scale* OR questionnaire* OR assessment*) AND TOPIC: ("high income countr*" OR "developed countr*") AND TOPIC: (individual* OR household*)<br/><br/>Timespan: 2000-2020. Search language=Auto</p>                                                                                                                   |
